# Supplementary material for: The PhyloPythiaS Web Server for Taxonomic Assignment of Metagenome Sequences
Source: PubMed Central journal article supplement (PMC3380018; doi:10.1371/journal.pone.0038581), 2012-06-20

## Actual assignment across ranks

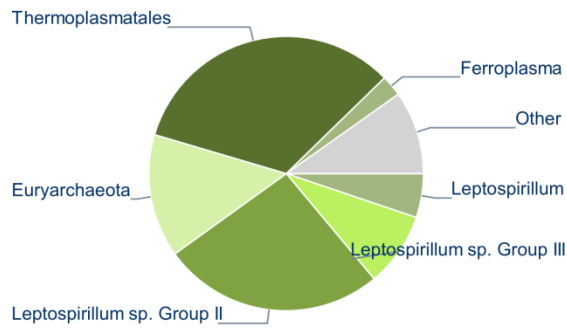

## Genus

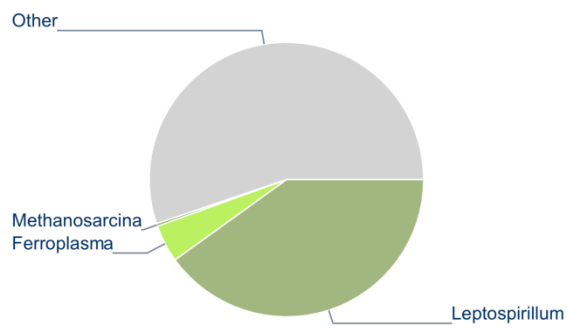

## Order

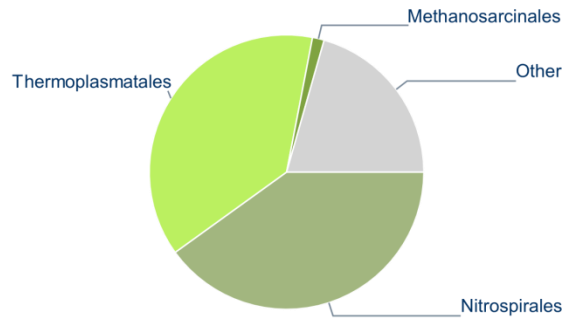

## Phylum

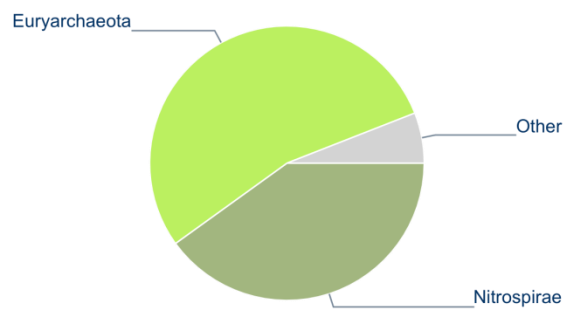

## Superkingdom

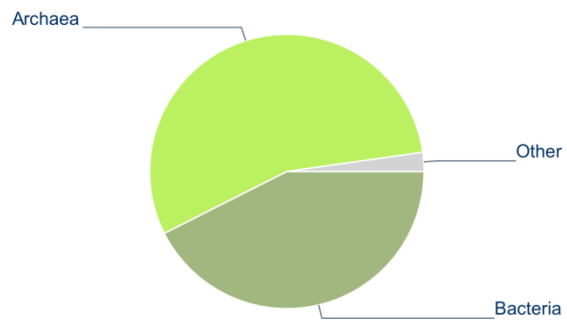

Supplement: pone.0038581.s002.pdf [file pone.0038581.s002.pdf]
