# Supplementary material for: The PhyloPythiaS Web Server for Taxonomic Assignment of Metagenome Sequences
Source: PubMed Central journal article supplement (PMC3380018; doi:10.1371/journal.pone.0038581), 2012-06-20
Supplement: pone.0038581.s007.pdf [file pone.0038581.s007.pdf]

**Table S1**

Taxonomic distance analysis for AMD metagenome scaffolds assignment to draft genome assemblies generated for five strains in the AMD metagenome project.

| Method | Measure       | Population |             |             |             |            | Taxonomic Distance |               |
|--------|---------------|------------|-------------|-------------|-------------|------------|--------------------|---------------|
|        |               | T<br>(404) | L1<br>(417) | L2<br>(126) | F1<br>(172) | F2<br>(64) | Micro average      | Macro average |
| PPS SS | Assigned      | 404        | 410         | 118         | 172         | 64         | --                 | --            |
|        | Const_n_scaff | 0.83       | 0.91        | 0.76        | 0.98        | 0.95       | 0.89               | 0.89          |
|        | Const_n_bp    | 0.89       | 0.94        | 0.95        | 0.99        | 0.99       | 0.94               | 0.95          |
|        | Tax dist      | 2.82       | 1.60        | 1.73        | 3.72        | 3.83       | 2.11               | 2.74          |
| PPS G  | Assigned      | 403        | 414         | 126         | 172         | 64         | --                 | --            |
|        | Const_n_scaff | 0.81       | 0.38        | 0.29        | 0.97        | 0.91       | 0.63               | 0.67          |
|        | Const_n_bp    | 0.86       | 0.38        | 0.11        | 0.99        | 0.98       | 0.62               | 0.66          |
|        | Tax dist      | 2.96       | 8.01        | 7.56        | 4.46        | 3.70       | 4.97               | 5.34          |
| BLASTN | Assigned      | 403        | 416         | 126         | 172         | 64         | --                 | --            |
|        | Const_n_scaff | 0.13       | 0.16        | 0.05        | 0.07        | 0.08       | 0.12               | 0.10          |
|        | Const_n_bp    | 0.08       | 0.11        | 0.01        | 0.02        | 0.02       | 0.05               | 0.05          |
|        | Tax dist      | 5.65       | 11.18       | 11.45       | 7.97        | 6.64       | 7.90               | 8.58          |
| MEGAN  | Assigned      | 377        | 306         | 89          | 164         | 63         | --                 | --            |
|        | Const_n_scaff | 0.38       | 0.67        | 0.61        | 0.24        | 0.25       | 0.22               | 0.43          |
|        | Const_n_bp    | 0.33       | 0.65        | 0.57        | 0.19        | 0.12       | 0.37               | 0.37          |
|        | Tax dist      | 4.16       | 6.91        | 6.62        | 6.98        | 5.81       | 3.55               | 6.09          |
| NBC    | Assigned      | 403        | 413         | 126         | 172         | 63         | --                 | --            |
|        | Const_n_scaff | 0.00       | 0.00        | 0.00        | 0.00        | 0.00       | 0.00               | 0.00          |
|        | Const_n_bp    | 0.00       | 0.00        | 0.00        | 0.00        | 0.00       | 0.00               | 0.00          |
|        | Tax dist      | 11.35      | 10.97       | 10.65       | 14.85       | 13.63      | 12.40              | 12.29         |
